# Supplementary material for: Rotational Dynamics of Optically Trapped Human Spermatozoa
Source: ScientificWorldJournal. 2014 Jan 29;2014:154367. doi: 10.1155/2014/154367 (PMC3926395; doi:10.1155/2014/154367)
Supplement: Supplementary file 1 — Real-time video clip showing the rotational dynamics of a trapped sperm cell. The conversion of the translational motion into rotational motion upon trapping a sperm cell is seen. [file 154367.f1.zip]

Archive with 2 entries (1 files):
- 154367.f1/
- 154367.f1/mat.154367.v1.mp4
